# Supplementary material
Source: Springer Nature journal article supplement (https://www.springermedizin.de/resource/supplementary/12885_2013_4475_MOESM2_ESM.pdf/9466514)
Supplement: MOESM2 [file 9466514]

**Table S1. X-tile for minimum *P* value*****P* values for TTR (n=342)**

| Score | iSirt1 | pSirt1 | iSirt2 | pSirt2 | iSirt3 | pSirt3 | iSirt4 | pSirt4 | iSirt5 | pSirt5 | iSirt6 | pSirt6 | iSirt7 | pSirt7 |
|-------|--------|--------|--------|--------|--------|--------|--------|--------|--------|--------|--------|--------|--------|--------|
| 0     | 0.752  | 1.000  | 0.121  | 0.439  | 0.069  | 0.294  | 0.752  | 0.655  | 0.655  | 0.752  | 0.294  | 0.094  | 0.439  | 1.000  |
| 1     | 0.752  | 1.000  | 0.527  | 0.371  | 0.157  | 0.317  | 0.371  | 0.752  | 0.403  | 0.752  | 0.584  | 0.138  | 0.371  | 1.000  |
| 2     | 1.000  | 0.752  | 0.074  | 0.138  | 0.011  | 0.527  | 0.051  | 0.014  | 0.036  | 0.752  | 1.000  | 0.114  | 0.527  | 0.147  |
| 3     | 1.000  | 0.129  | 0.584  | 0.403  | 0.129  | 0.254  | 0.254  | 0.371  | 0.034  | 0.192  | 1.000  | 0.016  | 0.206  | 0.107  |
| 4     | 0.273  | 1.000  | 0.480  | 0.192  | 1.000  | 0.016  | 0.403  | 0.019  | 0.584  | 0.129  | 0.655  | 1.000  | 0.051  | 0.051  |
| 5     | 0.094  |        | 0.403  | 0.439  | 0.403  | 1.000  | 1.000  | 0.094  | 0.403  | 0.221  | 1.000  |        | 0.273  | 0.752  |
| 6     | 0.752  |        | 1.000  | 1.000  | 1.000  | 1.000  |        | 0.254  | 1.000  | 0.584  | 1.000  |        | 0.317  | 0.480  |
| 7     | 1.000  |        | 1.000  |        |        |        |        | 1.000  |        | 1.000  |        |        | 0.317  | 1.000  |
| 8     |        |        |        |        |        |        |        |        |        |        |        |        | 1.000  |        |

***P* values for OS (n=342)**

| Score | iSirt1 | pSirt1 | iSirt2 | pSirt2 | iSirt3 | pSirt3 | iSirt4 | pSirt4 | iSirt5 | pSirt5 | iSirt6 | pSirt6 | iSirt7 | pSirt7 |
|-------|--------|--------|--------|--------|--------|--------|--------|--------|--------|--------|--------|--------|--------|--------|
| 0     | 0.655  | 0.752  | 0.371  | 0.480  | 0.001  | 0.011  | 0.317  | 0.034  | 0.180  | 0.294  | 0.254  | 0.527  | 1.000  | 1.000  |
| 1     | 0.584  | 0.343  | 0.480  | 0.752  | 0.000  | 0.023  | 0.030  | 0.114  | 0.012  | 0.138  | 0.655  | 0.317  | 0.584  | 0.752  |
| 2     | 0.221  | 0.752  | 0.009  | 0.114  | 0.001  | 0.584  | 0.004  | 0.008  | 0.001  | 0.206  | 1.000  | 0.020  | 0.527  | 0.343  |
| 3     | 0.254  | 0.061  | 0.074  | 0.078  | 0.006  | 0.192  | 0.180  | 0.254  | 0.001  | 0.083  | 0.655  | 0.017  | 0.157  | 0.480  |
| 4     | 0.254  | 1.000  | 0.655  | 0.024  | 0.655  | 0.024  | 0.480  | 0.074  | 0.439  | 0.157  | 0.584  | 1.000  | 0.114  | 0.036  |
| 5     | 0.168  |        | 0.655  | 0.138  | 0.480  | 0.371  | 1.000  | 0.107  | 0.480  | 1.000  | 0.752  |        | 0.273  | 0.004  |
| 6     | 0.584  |        | 0.752  | 1.000  | 1.000  | 1.000  |        | 0.480  | 1.000  | 0.439  | 1.000  |        | 0.254  | 0.046  |
| 7     | 1.000  |        | 1.000  |        |        |        |        | 1.000  |        | 1.000  |        |        | 0.237  | 0.083  |
| 8     |        |        |        |        |        |        |        |        |        |        |        |        | 1.000  | 1.000  |

Note: OS, overall survival; TTR, time to recurrence.
